# 1 Side by side comparison of three fully automated SARS-CoV-2 2 antibody assays with a focus on specificity

## 3 *Running head: Specificity of automated Anti-SARS-CoV-2 assays*

4  
5 Thomas Perkmann<sup>1</sup>, Nicole Perkmann-Nagele<sup>1</sup>, Marie-Kathrin Breyer<sup>2</sup>, Robab Breyer-Kohansal<sup>2</sup>, Otto C Burghuber<sup>3</sup>,  
6 Sylvia Hartl<sup>2,3</sup>, Daniel Aletaha<sup>4</sup>, Daniela Sieghart<sup>4</sup>, Peter Quehenberger<sup>1</sup>, Rodrig Marculescu<sup>1</sup>, Patrick Mucher<sup>1</sup>, Robert  
7 Strassl<sup>1</sup>, Oswald F Wagner<sup>1</sup>, Christoph J Binder<sup>1</sup>, and Helmuth Haslacher<sup>1\*</sup>

8  
9 <sup>1</sup>Department of Laboratory Medicine, Medical University of Vienna, Vienna, Austria

10 <sup>2</sup>Department of Respiratory and Critical Care Medicine and Ludwig Boltzmann Institute for COPD and Respiratory Epidemiology, Otto Wagner  
11 Hospital, Vienna, Austria

12 <sup>3</sup>Sigmund Freud University, Medical School and Ludwig Boltzmann Institute for COPD and Respiratory Epidemiology, Vienna, Austria

13 <sup>4</sup>Divison of Rheumatology, Department of Medicine III, Medical University of Vienna, Vienna, Austria

14

15 \*Please address all correspondence to:

16 Helmuth Haslacher, MD PhD MSc BSc BA

17 Medical University of Vienna, Department of Laboratory Medicine

18 Waehringer Guertel 18-20, A-1090 Vienna

19 Phone: +43 1 40400 53190

20 Fax: +43 1 40495 15547

21 E-Mail: [helmuth.haslacher@meduniwien.ac.at](mailto:helmuth.haslacher@meduniwien.ac.at)

22

23 Key words:

24 SARS-CoV-2; serology; specificity; laboratory automation; positive predictive value;  
25 seroprevalence;

26

27 List of abbreviations:

|               |                                                 |
|---------------|-------------------------------------------------|
| 28 COVID-19   | Coronavirus disease 2019                        |
| 29 SARS-CoV-2 | Severe Acute Respiratory Syndrome Coronavirus 2 |
| 30 RT-PCR     | Reverse transcriptase-polymerase chain reaction |
| 31 ECLIA      | Electrochemiluminescence assay                  |
| 32 95% CI     | 95% confidence interval                         |
| 33 CMIA       | Chemiluminescent microparticle immunoassay      |
| 34 NPA        | Negative percentage agreement                   |
| 35 CLIA       | Chemiluminescence immunoassay                   |
| 36 ROC        | Receiver-operating-characteristics              |
| 37 AUC, AUROC | Area under the (ROC-)curve                      |
| 38 LOD        | Limit of detection                              |
| 39 PPV        | Positive predictive value                       |
| 40 NPV        | Negative predictive value                       |
| 41 nAbs       | Neutralizing antibodies                         |
| 42 EUA        | Emergency Use Authorization                     |

## 43 **ABSTRACT**

44 **Background:** In the context of the COVID-19 pandemic, numerous new serological  
45 test systems for the detection of anti-SARS-CoV-2 antibodies have become available  
46 quickly. However, the clinical performance of many of them is still insufficiently  
47 described. Therefore we compared three commercial, CE-marked, SARS-CoV-2  
48 antibody assays side by side.

49 **Methods:** We included a total of 1,154 specimens from pre-COVID-19 times and 65  
50 samples from COVID-19 patients ( $\geq 14$  days after symptom onset) to evaluate the test  
51 performance of SARS-CoV-2 serological assays by Abbott, Roche, and DiaSorin.

52 **Results:** All three assays presented with high specificities: 99.2% (98.6-99.7) for  
53 Abbott, 99.7% (99.2-100.0) for Roche, and 98.3% (97.3-98.9) for DiaSorin. In contrast to  
54 the manufacturers' specifications, sensitivities only ranged from 83.1% to 89.2%.  
55 Although the three methods were in good agreement (Cohen's Kappa 0.71-0.87),  
56 McNemar's test revealed significant differences between results obtained from Roche  
57 and DiaSorin. However, at low seroprevalences, the minor differences in specificity  
58 resulted in profound discrepancies of positive predictability at 1% seroprevalence: 52.3%  
59 (36.2-67.9), 77.6% (52.8-91.5), and 32.6% (23.6-43.1) for Abbott, Roche, and DiaSorin,  
60 respectively.

61

62 **Conclusion:** We find diagnostically relevant differences in specificities for the anti-  
63 SARS-CoV-2 antibody assays by Abbott, Roche, and DiaSorin that have a significant  
64 impact on the positive predictability of these tests.

65

## 66 **Introduction**

67 COVID-19 is a new disease caused by Severe Acute Respiratory Syndrome  
68 Coronavirus 2 (SARS-CoV-2), which was first described by Chinese scientists in early  
69 January 2020 (1). On March 11, the WHO officially declared the novel SARS-CoV-2  
70 infections a pandemic, which has now spread rapidly across the entire globe, with  
71 almost 6.5 million confirmed cases and over 375,000 confirmed deaths (2). COVID-19 is  
72 characterized by a broad spectrum of individual disease courses, ranging from  
73 asymptomatic infections to the most severe cases requiring intensive medical care (3).  
74 The reliable detection of infected persons and, subsequently, their isolation is essential  
75 for the effort to prevent the spread of the SARS-CoV-2 virus quickly and efficiently.  
76 Therefore, reverse transcriptase-polymerase chain reaction (RT-PCR) testing is required  
77 for direct detection of the pathogen. Unfortunately, RT-PCR testing does not always give  
78 a clear answer to whether the SARS-CoV-2 infection is currently present or not (4,5).  
79 On the other hand, serological testing for SARS-CoV-2 specific antibodies can be used  
80 as an additional diagnostic tool in case of suspected false-negative RT-PCR results (6)  
81 or for individual determination of antibody levels. Moreover, cross-sectional serological  
82 studies provide essential epidemiological information to allow a correct estimation of the  
83 spread of the disease within a population (7,8). The first commercially available  
84 serological SARS-CoV-2 tests, mostly standard ELISA tests or lateral flow rapid tests,  
85 have not always proved to be sufficiently specific and sensitive (9,10). Recently, the first  
86 tests for fully automated large-scale laboratory analyzers have been launched. The  
87 present evaluation aims to compare three of these test systems manufactured by Abbott  
88 (11), Roche (12), and DiaSorin (13), with particular emphasis on specificity, which is

89 crucial for an adequate positive predictive value given the current low seroprevalence  
90 worldwide.

## 91 **Materials and methods**

### 92 **Study design and patient cohorts**

93 This nonblinded prospective study aims at a detailed comparison of three automated  
94 SARS-CoV-2 detection methods with a particular focus on specificity and positive  
95 predictability. A total of 1,154 samples from three cohorts of patients/participants with  
96 sampling dates before 01.01.2020 were used to test specificity. The samples derived  
97 from three different collections: a cross-section of the Viennese population, LEAD study  
98 (14), preselected for samples collected between November and April to enrich seasonal  
99 infections (n=494); a collection of healthy voluntary donors (n=302; 269 individuals, 11  
100 donors with a 4-fold repetition of the donation within a median period of 4.5 years [3.6-  
101 5.5]); a disease-specific collection of samples from patients with rheumatic diseases  
102 (n=358).

103 For estimation of test sensitivity, samples of 65 COVID-19 donors/patients with a  
104 symptom onset to analysis time of  $\geq 14$  days (median time interval of 41 [28-49] days)  
105 were evaluated in parallel on all three analysis platforms. For asymptomatic donors  
106 (n=6), SARS-CoV-2 RT-PCR confirmation to analysis time was used instead. We  
107 subjected only a single serum sample per patient to sensitivity analysis to avoid data  
108 bias due to uncontrolled multiple measurement points of individual patients.

109 Supplementary Table 1 gives a comprehensive overview of characteristics and cohort-  
110 specific inclusion and exclusion criteria; Supplementary Table 2, 3, and Supplementary  
111 Fig. 1 provide additional descriptive statistics on donors/patients included in the cohorts.  
112 All included participants gave written informed consent for donating their samples for  
113 scientific purposes. From patients, only left-over material from diagnostic procedures  
114 was used. The overall evaluation plan conformed with the Declaration of Helsinki as well  
115 as with relevant regulatory requirements. It was reviewed and approved by the ethics  
116 committee of the Medical University of Vienna (1424/2020).

## 117 **Biomaterials**

118 Used serum samples were either left-over materials from diagnostic procedures  
119 (Department of Laboratory Medicine, Medical University of Vienna) or part of a sample  
120 cohort processed and stored by the MedUni Wien Biobank. All pre-analytical processes  
121 were carried out according to standard operating procedures in an ISO 9001:2008/2015-  
122 certified (MedUni Wien Biobank, Department of Laboratory Medicine) and ISO  
123 15189:2012-accredited (Department of Laboratory Medicine) environment. Standard  
124 sample protocols were described previously (15).

## 125 **Antibody testing**

126 SARS-CoV-2 specific antibodies were measured according to the manufacturers'  
127 instructions on three different automated platforms at the Department of Laboratory  
128 Medicine of the Medical University of Vienna.

129 1. IgG antibodies against SARS-CoV-2 nucleocapsid (SARS-CoV-2 IgG) were quantified  
130 employing a chemiluminescent microparticle immunoassay (CMIA) on the Abbott

131 ARCHITECT® i2000sr platform (Abbott Laboratories, Chicago, USA). For the cut-off of  
132  $\geq 1.4$  Index (S/C), the manufacturer gives a negative percentage agreement (NPA,  
133 corresponding to specificity) of 99.60% (95% CI: 98.98 – 99.89) calculated from samples  
134 collected before the COVID-19 outbreak and of 100.00% (95.07 – 100.00) in patients  
135 with other respiratory illnesses. Regarding diagnostic sensitivity, 0.00% (0.00 – 60.24)  
136 are reported <3 days after symptom onset, 25.00% (3.19 – 65.09) on days 3 – 7,  
137 86.36% (65.09 – 97.09) on days 8 – 13, and 100.00% (95.89 – 100.00) from day 14 on  
138 (11). According to the manufacturer, the assay is designed for the qualitative detection  
139 of IgG antibodies to SARS-CoV-2.

140 2. The Elecsys® Anti-SARS-CoV-2 assay (Roche Diagnostics, Rotkreuz, Switzerland)  
141 was applied on a Cobas e 801 modular analyzer. It detects total antibodies against the  
142 SARS-CoV-2 nucleocapsid (N) antigen in a sandwich electrochemiluminescence assay  
143 (ECLIA). For the suggested cut-off of  $\geq 1$  COI, the manufacturer reports specificities of  
144 99.80% (95% CI: 99.58 – 99.92) for samples derived from diagnostic routine, 99.83%  
145 (99.51 – 99.97) for blood donors, and 100% (91.19 – 100) for both a common cold panel  
146 and a Coronavirus panel. Sensitivity was estimated as 65.5% (56.1 – 74.1) during days  
147 0 – 6 post RT-PCR confirmation, 88.1% (77.1 – 95.1) from day 7 to day 13, and 100%  
148 (88.1 – 100%) from day 14 on (12). According to the manufacturer, the system delivers  
149 qualitative results, either being reactive or non-reactive for anti-SARS-CoV-2 antibodies.

150 3. The LIAISON® SARS-CoV-2 S1/S2 IgG test detects IgG-antibodies against the  
151 S1/S2 domains of the virus' spike protein in a chemiluminescence immunoassay (CLIA).  
152 The test was applied to a LIAISON® XL Analyzer (DiaSorin S.p.A., Saluggia, Italy). The  
153 manufacturer reports a diagnostic specificity of 98.5% (95% CI: 97.5 – 99.2) in blood  
154 donors and 98.9% in presumably SARS-CoV-2 negative diagnostic routine samples

155 (94.0 – 99.8). Applying a cut-off >15.0 AU/mL (borderline results 12.0 – 15.0, require a  
156 re-test algorithm), the test's sensitivity is reported time-dependently with 25.0% (14.6 –  
157 39.4) ≤5 days after RT-PCR-confirmed diagnosis, 90.4% (79.4 – 95.8) from day 5 to day  
158 15, and 97.4% (86.8 – 99.5) after >15 days (13). Samples that repeatedly tested  
159 borderline were classified as positive. The manufacturer indicates to provide quantitative  
160 measurement results on the system.

## 161 **Statistical analysis**

162 Unless stated otherwise, continuous data are given as median (quartile 1 – quartile 3).  
163 Categorical data are given as counts and percentages. Diagnostic sensitivity and  
164 specificity, as well as positive and negative predictive values, were calculated using  
165 MedCalc software 19.2.1 (MedCalc Ltd., Ostend, Belgium). 95% confidence intervals  
166 (CI) for sensitivity and specificity were calculated according to Clopper and Pearson  
167 ("exact" method) with standard logit confidence intervals for the predictive values (16).  
168 Receiver-Operating-Characteristic (ROC)-curve analysis was used to evaluate test  
169 accuracy and compare the diagnostic performance of the three test systems, according  
170 to DeLong et al. (17). Between-test agreements were assessed by interpretation of  
171 Cohen's Kappa-statistics, and further evaluated with McNemar's tests. Statistical  
172 significance was assumed at  $p < 0.05$ . Figures were produced with MedCalc software  
173 19.2.1 and GraphPad Prism 8 (GraphPad Software, San Diego, USA).

174

175



## 176 **Results**

### 177 **Specificity**

178 To describe assay specificity, we used a total of 1,154 serum samples collected before  
179 SARS-CoV-2 circulated in the population and which are, by definition, negative for  
180 SARS-CoV-2 specific antibodies. The three different specificity cohorts A-C (described  
181 in detail in Supplementary Table 1-3 and Supplementary Figure 1) presented with  
182 different rates of false-positives (Table 1) - cohort C (cohort of rheumatic diseases)  
183 showing the highest reactivities. We found in total 9, 3, and 20 false-positive samples for  
184 Abbott, Roche, and DiaSorin, leading to an assay specificity of 99.2 (95%CI: 98.6-99.7),  
185 99.7% (95%CI: 99.2-100.0), and 98.3% (95%CI: 97.3-98.9) respectively (Figure 1A-C).  
186 Median and 90th percentile values of negative samples were 0.025 and 0.115 Index for  
187 Abbott, 0.0815 and 0.0927 COI for Roche, and below LOD and 5.52 AU/ml for  
188 DiaSorin. False-positive samples yielded median values of 2.21 Index (2.14-2.67) for  
189 Abbott SARS-CoV-2 IgG (cut-off:  $\geq 1.4$  Index), 1.65 COI (1.47-1.72) for Roche Elecsys®  
190 Anti-SARS-CoV-2 (cut-off:  $\geq 1$  COI), and 22.4 AU/ml (17.38-57.35) for DiaSorin  
191 LIAISON® SARS-CoV-2 S1/S2 IgG (negative  $< 12.0$  AU/ml, equivocal  $12.0$  AU/ml  $\leq x$   
192  $< 15.0$  AU/ml, positive  $\geq 15.0$  AU/ml).

### 193 **Sensitivity**

194 To estimate assay sensitivity, we used serum samples from 65 donors/patients at later  
195 time points following SARS-CoV-2 infection, at least  $\geq 14$  days after symptom onset  
196 (median interval of 41 [28-49] days). In this late phase, we assumed the majority of  
197 donors/patients having reached prominent and constant levels of SARS-CoV-2 specific

198 antibodies. Surprisingly, we could find a relatively high percentage of samples that were  
199 testing negative for SARS-CoV-2 antibodies: Abbott 10, Roche 7, and DiaSorin 11 false-  
200 negatives leading to calculated sensitivities of 84.6% (73.6-92.4), 89.2% (79.1-95.6),  
201 and 83.1 (71.3-91.2)%, respectively. Five serum samples were consistently tested  
202 negative in all three assays despite being derived from individuals tested positive for  
203 SARS-CoV-2 by RT-PCR. All seven false-negatives in the Roche test overlapped with  
204 false-negatives in the Abbott test (both nucleocapsid-antigen based assays), whereas  
205 DiaSorin was negative for an additional six serum samples exclusively (S1/S2-domain  
206 antigen-based assay).

## 207 **PPV and NPV**

208 Although specificity and sensitivity are essential criteria for assessing the quality of a test  
209 procedure, they have little informative value about the probability of a positive/negative  
210 test result, indicating the presence/absence of SARS-CoV-2 specific antibodies without  
211 taking prevalence into account. Therefore, a comparative overview for specificity,  
212 sensitivity, as well as positive and negative predictive values at 1%, 5%, and 10%  
213 SARS-CoV-2 antibody seroprevalence is shown in Figures 2A and 2B and summarized  
214 in Table 2. While the differences between the test systems for varying seroprevalences  
215 do not have a significant impact on NPV (range 98.1%-99.9%), the consequences for  
216 PPV are pronounced. At seroprevalence rates of 10%, all three systems show  
217 acceptable PPVs of 92.3%, 97.4%, and 84.2% for Abbott, Roche, and DiaSorin, but at  
218 1% seroprevalence these drop to unsatisfactorily or even unacceptably low values of  
219 52.3% (36.2-67.9), 77.6% (52.8-91.5), and 32.6% (23.6-43.1) for Abbott, Roche, and  
220 DiaSorin.

## 221 **ROC Curve Analysis**

222 As shown in Figure 3A-C, all three ROC curves presented with areas under the curves  
223 (AUC) above 0.97 (Abbott: 0.994 [95% CI: 0.987-0.997], Roche: 0.989 [0.981-0.994],  
224 DiaSorin: 0.977 [0.967-0.985]). Comparison of ROC-AUCs, according to DeLong et al.,  
225 did not reveal significant differences (Differences: Abbott/Roche  $p=0.487$ ,  
226 Abbott/DiaSorin  $p=0.112$ , Roche/DiaSorin  $p=0.395$ ). In the next step, we aimed to  
227 assess whether modifying the cut-off values could improve the explanatory power of the  
228 ROC-curves.

229 Cut-offs associated with the Youden's index (maximum sum of sensitivity and specificity)  
230 of  $>0.42$ ,  $>0.355$ , and  $>8.76$  for Abbott, Roche, and DiaSorin lowered the PPV  
231 considerably, being as low as 26.4 (20.3-33.6), 62.1 (43.9-77.4), and 24.8 (18.9-31.9) at  
232 1% seroprevalence for Abbott, Roche, and DiaSorin (Supplementary Table 4).

## 233 **Between-test agreement/disagreement**

234 Correlation analysis of measurement values between the different platforms showed  
235 only moderate to weak concordance. The Pearson correlation coefficient was  $r=0.66$   
236 ( $p<0.001$ ), for both Abbott/DiaSorin (both IgG-assays) and Abbott/Roche (both  
237 nucleocapsid-antigen based assays). In contrast, Roche/DiaSorin, with a coefficient of  
238  $r=0.25$  and a hardly reached significance of 0.044, could only show a very weak  
239 correlation.

240 Therefore, the test systems' agreements were studied in a pairwise fashion applying  
241 inter-rater agreement statistics (Cohen's Kappa). The agreement between Abbott and  
242 Roche was very good (0.87 [0.81-0.94]). Agreement between Abbott and DiaSorin, and  
243 DiaSorin and Roche was good: 0.71 (0.62-0.80), and 0.76 (0.67-0.84), respectively

244 (Table 3). Despite a good overall inter-rater agreement, significant differences could be  
245 shown using McNemar's test for DiaSorin and Roche (Supplementary Table 5).

## 246 **Discussion**

247 To the best of our knowledge, this is the first side-by-side comparison of three fully  
248 automated SARS-CoV-2 antibody tests applying more than 1,200 distinct donor/patient  
249 samples. We identified significant differences between two of the three systems,  
250 especially regarding positive predictability at the expectable low prevalence rates.  
251 SARS-CoV-2 is a new virus closely related to the betacoronaviruses SARS-CoV and  
252 MERS. Like SARS-CoV-2, those highly virulent pathogens cause severe respiratory  
253 syndromes, often with lethal outcome (18). In contrast, infections with other members of  
254 the coronavirus family usually present with mild colds, including 229E, OC43, NL63, and  
255 HKU1 (19). Compared to SARS-CoV (which is no longer circulating), cross-reactivity  
256 between SARS-CoV-2 and endemic seasonal coronaviruses is low. To date, with few  
257 exceptions (24), no accumulation of cross-reactivities between anti-SARS-CoV-2  
258 antibodies and seasonal coronavirus antibodies has been found. We have therefore  
259 refrained from screening a coronavirus panel for possible cross-reactivity.

260

### 261 *Specificity*

262 To best describe the specificity of a serological test, it is essential to have a reliable  
263 reference, i.e., to ensure that the samples used are negative for the target analyte. For  
264 SARS-CoV-2, this means using serum/plasma samples obtained before the first  
265 appearance of the new virus. Therefore, we have compiled large pre-COVID-19 cohorts,  
266 which have the following characteristics: A) samples of an age and sex-controlled

267 population-based cohort of more than 11,000 participants (LEAD-Study) (14), randomly  
268 chosen from Vienna and surrounding areas (n=494). B) samples of healthy voluntary  
269 donors (n=302), which are typically used at our Department for the evaluation of new  
270 assays, and C) samples of a disease-specific collection of patients with rheumatic  
271 diseases including rheumatoid arthritis and systemic lupus erythematoses (n=358),  
272 known to have a high prevalence of autoantibodies and other atypical immune activities,  
273 enhancing the potential of interference with serological testing. We found several false-  
274 positives in the rheumatological cohort (n=13), and to a lesser extent in the other two  
275 cohorts (n=9 in the healthy donor cohort and n=10 in the LEAD study). Notably, an  
276 overlap of samples tested false-positive in the different systems did not typically occur,  
277 and only one of 32 samples tested positive in more than one assay (Abbott and  
278 DiaSorin, one sample from the LEAD study). Since these two test systems use different  
279 antigens (nucleocapsid vs. S1/S2 proteins) but the same detection method (IgG), this  
280 false-positive reaction is likely associated with interference of the IgG measurement.  
281 Calculated specificities are strongly dependent on the spectrum and the size of a  
282 selected specificity cohort. If we calculated the specificities of each cohort separately,  
283 we would be able to report variable specificities: cohort A (Abbott 99.2%, Roche 100%,  
284 DiaSorin 98.8%), cohort B (Abbott 99%, Roche 99.7%, DiaSorin 98.3%), and cohort C  
285 (Abbott 99.4%, Roche 99.4%, DiaSorin 97.5%). Roche would range from ideal 100%  
286 down to 99.4%, the same level as the best result for Abbott, and DiaSorin would be  
287 nearly as good as the worst Abbott specificity or show a 2.5% difference to the best  
288 Roche value. This would have an enormous impact on prevalence dependent  
289 parameters like PPV. A recent evaluation of the DiaSorin LIAISON® SARS-CoV-2  
290 S1/S2 IgG assay with 1,140 pre-COVID-19 samples reported a specificity of 98.5% (20),

291 nearly perfectly matching the specificity of 98.3% we found when calculating the average  
292 of all three cohorts. In contrast, another recent study reported a specificity of 100% for  
293 DiaSorin. However, the authors used only n=81 samples for specificity testing (21).  
294 Similarly, a further evaluation comparing all three SARS-CoV-2 tests by Abbott, Roche,  
295 and DiaSorin found quite different specificities, namely 100%, 98%, and 96.9% for  
296 Abbott, Roche, and DiaSorin, respectively. Again, the specificity cohort was very small  
297 (n=100, and n=98 for DiaSorin) (22). This underlines the importance of selecting  
298 adequately sized testing cohorts to obtain reliable and comparable results. In summary,  
299 the specificities of 99.2%, 99.7%, and 98.3% found in the present study are very close to  
300 the values given by the manufacturers of 99.6%, 99.8%, and 98.5% for Abbott, Roche,  
301 and Diasorin, which were also established on large collectives.

### 302 *Sensitivity*

303 The COVID-19 positive cohort used in this study for the estimation of sensitivities is  
304 relatively small (n=65). However, it has three distinctive features:

- 305 1. each patient/donor is represented in the collective with only one serum sample,  
306 avoiding bias of the data by multiple measurements of the same individuals,
- 307 2. the median time of blood sampling was 41 days after onset of symptoms and thus  
308 in the plateau phase of antibody formation, and
- 309 3. 80% of the cohort were non-hospitalized COVID-19 patients (two-thirds of them  
310 with mild symptoms), and only 20% were intensive care patients.

311 As sensitivity within the first 14 days after symptom onset is highly variable for most  
312 SARS-CoV-2 antibody assays but becomes better >14 days (23,24), we expected high  
313 sensitivities for all tested assays in the plateau phase of antibody formation. Surprisingly  
314 we found multiple RT-PCR confirmed COVID-19 patients displaying very low antibody

315 titers that did not surpass the respective assay-specific cut-offs and therefore were  
316 considered negative. Five samples were negative in all three assays: all were RT-PCR  
317 confirmed cases, 4/5 non hospitalized (42-51 days after symptom onset), two with mild  
318 and the other two with moderate symptoms, and symptom duration of <1 week for all.  
319 None of these patients had a known immune dysfunction or other severe diseases. One  
320 patient was an ICU patient with an underlying hematological disease, and the sample  
321 was taken at day 15 after symptom onset. This patient mounted a partial antibody  
322 response starting from day 21 after symptom onset becoming positive in the Abbott  
323 assay (2.21 Index) and reaching positivity on day 30 also in the DiaSorin assay (29.1  
324 AU/ml). At this late point, Abbott measured 4.19 Index, whereas Roche remained (since  
325 day 21) at a level around 0.2 COI. This example illustrates that although the vast  
326 majority of patients show compatible and plausible results in different test systems,  
327 single cases can display a complex picture of time-courses and reactivities in specific  
328 assay systems that are still poorly understood. Another interesting observation was that  
329 in six patients with positive detection of SARS-CoV-2 specific antibodies in the Roche  
330 and Abbott test, DiaSorin failed to detect antibodies. This observation, combined with  
331 the claim that the detection of S1/S2 protein-specific antibodies is equivalent to the  
332 detection of neutralizing antibodies (nAbs) (20), raises the fundamental question of  
333 whether nAbs are detectable in all patients with confirmed COVID-19 infection. There is  
334 evidence that neither the assumption of equivalence of nAbs and S1/S2 protein-specific  
335 antibodies (25) nor the assumption that all COVID-19 patients produce measurable titers  
336 of nAbs is universally valid (26). A clear answer to the question of whether antibody  
337 measurements against nucleocapsid- or spike protein-associated antigens are more  
338 sensitive and specific, and how these behave in relation to nAbs assays (the postulated



339 gold standard in terms of sensitivity and specificity) is not possible based on the data  
340 currently available.

341 *PPV, NPV, ROC-Analysis, test agreement*

342 Specificity and sensitivity alone are not sufficient to judge the performance of a  
343 diagnostic test; prevalence-dependent accuracy measures like PPV and NPV are  
344 necessary, and especially PPV, in times of low prevalence (27). For most regions  
345 affected by the pandemic, the prevalence of SARS-CoV-2 antibody-positive individuals  
346 is unknown but can be estimated to be below 5%. Therefore, for all SARS-CoV-2 EUA  
347 approved antibody tests, the FDA compares the performance of the assays based on a  
348 5% seroprevalence (28). At this rate, the results presented here show PPV values of  
349 85.1% (74.7-91.7), 94.8% (85-98), and 71.6% (61.7-79.8) for Abbott, Roche, and  
350 DiaSorin, respectively. The PPV values between Roche and DiaSorin differ so clearly  
351 that not even the 95% CI intervals overlap. Therefore, we must assume that these two  
352 assays differ significantly from each other in terms of positive predictability. Using these  
353 two tests at lower seroprevalences, such as 1%, leads to an even more pronounced  
354 difference between Roche and DiaSorin (77.6% vs. 32.6%) and an unacceptable low  
355 PPV of 32.6% (23.6-43.1) for DiaSorin.

356 Although the area under the curves (0.994, 0.989, and 0.977 for Abbott, Roche, and  
357 DiaSorin) did not differ significantly from each other (sensitivity cohort size was too  
358 small), modeling of the cut-offs according to Youden's index revealed interesting  
359 insights: only Roche could increase the sensitivity without losing specificity dramatically  
360 (Sensitivity: 89.2% → 98.5%; Specificity: 99.7% → 99.4%; cut-off: >0.355 COI). In  
361 contrast, DiaSorin at the suggested cut-off of >8.76 AU/ml (similar to (20)) increased the  
362 sensitivity from 83.1% to 90.8% but worsened the specificity from 98.3 to 97.2%. In line



363 with this, despite a good overall agreement between Roche and DiaSorin results  
364 (Cohen's Kappa 0.76 [0.67-0.84]), the McNemar's test still showed significant  
365 differences, indicating disagreement (in particular in false-positives) more often than  
366 expected by chance.

367 The strength of this study is the side by side evaluation of three assays with a large  
368 number of negative samples to give reliable and comparable specificity data (no missing  
369 data). Limitations are the moderate numbers of positive samples. Moreover, obtained  
370 sensitivities cannot easily be compared to other studies because of the unique feature of  
371 our COVID-19 cohort, including 80% non-hospitalized patients with mainly mild  
372 symptoms. The latter is highly relevant for a potential use of antibody tests to assess  
373 seroprevalence in large populations.

## 374 **Conclusion**

375 We find diagnostically relevant differences in specificities for the anti-SARS-CoV-2  
376 antibody assays by Abbott, Roche, and DiaSorin that have a significant impact on the  
377 positive predictability of these tests. We conclude that low seroprevalences require an  
378 unusually high specificity for SARS-CoV-2 antibody tests, which pushes some test  
379 systems to their limits earlier than others. Therefore, the choice of the test must depend  
380 on the respective seroprevalence, and strategies such as confirmation of possible false-  
381 positive test results with additional testing must be considered.

## 382 **Acknowledgements**

383 We sincerely thank Marika Gerdov, Susanne Keim, Karin Mildner, Elisabeth Ponweiser,  
384 Manuela Repl, Ilse Steiner, Christine Thun, Martina Trella, for excellent technical  
385 assistance. Finally, we want to thank all the donors of the various study cohorts. Without  
386 their voluntary participation in the establishment of the biobanks, this study would not  
387 have been possible.

388

389

## 390 **References**

391

- 392 1. Zhu N, Zhang D, Wang W, Li X, Yang B, Song J, et al. A Novel Coronavirus from  
393 Patients with Pneumonia in China, 2019. *N Engl J Med. Massachusetts Medical*  
394 *Society*; 2020;382:727–33.
- 395 2. Dong E, Du H, Gardner L. An interactive web-based dashboard to track COVID-19  
396 in real time. *The Lancet Infectious Diseases. Elsevier*; 2020;20:533–4.
- 397 3. Chen Q, Zheng Z, Zhang C, Zhang X, Wu H, Wang J, et al. Clinical characteristics  
398 of 145 patients with corona virus disease 2019 (COVID-19) in Taizhou, Zhejiang,  
399 China. *Infection. Springer Berlin Heidelberg*; 2020;92:401–9.
- 400 4. Hase R, Kurita T, Muranaka E, Sasazawa H, Mito H, Yano Y. A case of imported  
401 COVID-19 diagnosed by PCR-positive lower respiratory specimen but with PCR-  
402 negative throat swabs. *Infect Dis (Lond). Taylor & Francis*; 2020;52:423–6.
- 403 5. Liu R, Han H, Liu F, Lv Z, Wu K, Liu Y, et al. Positive rate of RT-PCR detection of  
404 SARS-CoV-2 infection in 4880 cases from one hospital in Wuhan, China, from Jan  
405 to Feb 2020. *Clin Chim Acta. 2020*;505:172–5.
- 406 6. Yong G, Yi Y, Tuantuan L, Xiaowu W, Xiuyong L, Ang L, et al. Evaluation of the  
407 auxiliary diagnostic value of antibody assays for the detection of novel coronavirus  
408 (SARS-CoV-2). *Journal of Medical Virology. 2020*;:jmv.25919.

- 409 7. Farnsworth CW, Anderson NW. SARS-CoV-2 Serology: Much Hype, Little Data.  
410 Clin Chem. 2020.
- 411 8. Theel ES, Slev P, Wheeler S, Couturier MR, Wong SJ, Kadkhoda K. The Role of  
412 Antibody Testing for SARS-CoV-2: Is There One? J Clin Microbiol. 2020.
- 413 9. Infantino M, Grossi V, Lari B, Bambi R, Perri A, Manneschi M, et al. Diagnostic  
414 accuracy of an automated chemiluminescent immunoassay for anti-SARS-CoV-2  
415 IgM and IgG antibodies: an Italian experience. Journal of Medical Virology.  
416 2020;;jmv.25932.
- 417 10. Whitman JD, Hiatt J, Mowery CT, Shy BR, Yu R, Yamamoto TN, et al. Test  
418 performance evaluation of SARS-CoV-2 serological assays. medRxiv. Cold Spring  
419 Harbor Laboratory Press; 2020;;2020.04.25.20074856.
- 420 11. Abbott Diagnostics. SARS-CoV-2 IgG For Use With ARCHITECT, Revised April  
421 2020. 2020.
- 422 12. Roche Diagnostics. Elecsys Anti-SARS-CoV-2 package insert 2020-04, V1.0.  
423 2020.
- 424 13. DiaSorin S p A. LIAISON®SARS-CoV-2 S1/S2 IgG package insert 2020-04.  
425 2020.
- 426 14. Breyer-Kohansal R, Hartl S, Burghuber OC, Urban M, Schrott A, Agusti A, et al.  
427 The LEAD (Lung, Heart, Social, Body) Study: Objectives, Methodology, and  
428 External Validity of the Population-Based Cohort Study. J Epidemiol. Japan  
429 Epidemiological Association; 2019;29:315–24.

- 430 15. Haslacher H, Gerner M, Hofer P, Jurkowitsch A, Hainfellner J, Kain R, et al. Usage  
431 Data and Scientific Impact of the Prospectively Established Fluid Bioresources at  
432 the Hospital-Based MedUni Wien Biobank. *Biopres Biobanking*; 2018;16:477–82.
- 433 16. Mercaldo ND, Lau KF, Zhou XH. Confidence intervals for predictive values with an  
434 emphasis to case–control studies. *Statistics in Medicine*. John Wiley & Sons, Ltd;  
435 2007;26:2170–83.
- 436 17. DeLong ER, DeLong DM, Clarke-Pearson DL. Comparing the Areas under Two or  
437 More Correlated Receiver Operating Characteristic Curves: A Nonparametric  
438 Approach. *Biometrics*. 1988;44:837.
- 439 18. Rockx B, Kuiken T, Herfst S, Bestebroer T, Lamers MM, Oude Munnink BB, et al.  
440 Comparative pathogenesis of COVID-19, MERS, and SARS in a nonhuman  
441 primate model. *Science*. American Association for the Advancement of Science;  
442 2020;:eabb7314.
- 443 19. Weiss SR. Forty years with coronaviruses. *J Exp Med*. 2020;217.
- 444 20. Bonelli F, Sarasini A, Zierold C, Calleri M, Bonetti A, Vismara C, et al. Clinical And  
445 Analytical Performance Of An Automated Serological Test That Identifies S1/S2  
446 Neutralizing IgG In Covid-19 Patients Semiquantitatively. *bioRxiv*. Cold Spring  
447 Harbor Laboratory; 2020;25:2000082–35.
- 448 21. Tré-Hardy M, Wilmet A, Beukinga I, Dogné J-M, Douxfils J, Blairon L. Validation of  
449 a chemiluminescent assay for specific SARS-CoV-2 antibody. *Clinical Chemical  
450 Laboratory Medicine*. 2020.

- 451 22. Ekelund O, Ekblom K, Somajo S, Pattison-Granberg J, Olsson K, Petersson A.  
452 High-throughput immunoassays for SARS-CoV-2, considerable differences in  
453 performance when comparing three methods. medRxiv. Cold Spring Harbor  
454 Laboratory Press; 2020;:2020.05.22.20106294.
- 455 23. Tang MS, Hock KG, Logsdon NM, Hayes JE, Gronowski AM, Anderson NW, et al.  
456 Clinical Performance of Two SARS-CoV-2 Serologic Assays. Clin Chem. 2020.
- 457 24. Bryan A, Pepper G, Wener MH, Fink SL, Morishima C, Chaudhary A, et al.  
458 Performance Characteristics of the Abbott Architect SARS-CoV-2 IgG Assay and  
459 Seroprevalence in Boise, Idaho. J Clin Microbiol. 2020;:1–19.
- 460 25. Jääskeläinen AJ, Kuivanen S, Kekäläinen E, Ahava MJ, Loginov R, Kallio-Kokko  
461 H, et al. Performance of six SARS-CoV-2 immunoassays in comparison with  
462 microneutralisation. medRxiv. Cold Spring Harbor Laboratory Press;  
463 2020;:2020.05.18.20101618.
- 464 26. Wu F, Wang A, Liu M, Wang Q, Chen J, Xia S, et al. Neutralizing Antibody  
465 Responses to SARS-CoV-2 in a COVID-19 Recovered Patient Cohort and Their  
466 Implications. SSRN Journal. 2020.
- 467 27. Šimundić A-M. Measures of Diagnostic Accuracy: Basic Definitions. EJIFCC.  
468 International Federation of Clinical Chemistry and Laboratory Medicine;  
469 2009;19:203–11.
- 470 28. US Food Drug Administration. EUA Authorized Serology Test Performance  
471 [Internet]. fda.gov. 2020 [cited 2020 Jun 2]. Available from:

472 [https://www.fda.gov/medical-devices/emergency-situations-medical-devices/eua-](https://www.fda.gov/medical-devices/emergency-situations-medical-devices/eua-authorized-serology-test-performance)  
473 [authorized-serology-test-performance](https://www.fda.gov/medical-devices/emergency-situations-medical-devices/eua-authorized-serology-test-performance)

474

475 **Tables**

476 **Table 1.** Numbers and percentages of false positive SARS-CoV-2 antibody reactivities  
477 in three different specificity cohorts: Cohort A (LEAD-Study), Cohort B (Healthy donor  
478 collective), and Cohort C (Rheumatic diseases cohort).  $\chi^2$ -tests for differences of  
479 proportions: \*... Roche vs. DiaSorin  $p < 0.05$ , &... Abbott vs. Diasorin  $p < 0.05$

|                                               | <b>COHORT A</b> | <b>COHORT B</b> | <b>COHORT C</b>            | <b>TOTAL</b>          |
|-----------------------------------------------|-----------------|-----------------|----------------------------|-----------------------|
|                                               | <i>n=494</i>    | <i>n=302</i>    | <i>n=358</i>               | <b><i>n=1,154</i></b> |
| <b>Abbott SARS-CoV-2 IgG</b>                  | 4 (0.8%)        | 3 (1.0%)        | 2 (0.6%) <sup>&amp;</sup>  | <b>9 (0.8%)</b>       |
| <b>Roche Elecsys® Anti-SARS-CoV-2</b>         | 0 (0.0%)*       | 1 (0.3%)        | 2 (0.6%)*                  | <b>3 (0.3%)</b>       |
| <b>DiaSorin LIAISON® SARS-CoV-2 S1/S2 IgG</b> | 6 (1.2%)*       | 5 (1.7%)        | 9 (2.5%)* <sup>&amp;</sup> | <b>20 (1.7%)</b>      |

480

481



482 **Table 2.** Values for Specificity, Sensitivity, Positive-Predictive-Value (PPV) and  
 483 Negative-Predictive-Value (NPV) at 1%, 5% and 10% SARS-CoV-2 seroprevalence (SP)  
 484 with 95% confidence intervals (95% CI).

485

|                            | <b>Abbott SARS-CoV-2 IgG</b> |           | <b>Roche Elecsys® Anti-SARS-CoV-2</b> |           | <b>DiaSorin LIAISON® SARS-CoV-2 S1/S2 IgG</b> |           |
|----------------------------|------------------------------|-----------|---------------------------------------|-----------|-----------------------------------------------|-----------|
| <b>Statistic</b>           | Value                        | 95% CI    | Value                                 | 95% CI    | Value                                         | 95% CI    |
| <b>Sensitivity</b>         | <b>84.6%</b>                 | 73.6-92.4 | <b>89.2%</b>                          | 79.1-95.6 | <b>83.1%</b>                                  | 71.3-91.2 |
| <b>Specificity</b>         | <b>99.2%</b>                 | 98.6-99.7 | <b>99.7%</b>                          | 99.2-100  | <b>98.3%</b>                                  | 97.3-98.9 |
| <b>1% Seroprevalence</b>   |                              |           |                                       |           |                                               |           |
| <i>PPV</i>                 | <b>52.3%</b>                 | 36.2-67.9 | <b>77.6%</b>                          | 52.8-91.5 | <b>32.6%</b>                                  | 23.6-43.1 |
| <i>NPV</i>                 | <b>99.9%</b>                 | 99.7-99.9 | <b>99.9%</b>                          | 99.8-100  | <b>99.8%</b>                                  | 99.7-99.9 |
| <b>5% Seroprevalence</b>   |                              |           |                                       |           |                                               |           |
| <i>PPV</i>                 | <b>85.1%</b>                 | 74.7-91.7 | <b>94.8%</b>                          | 85.3-98.3 | <b>71.6%</b>                                  | 61.7-79.8 |
| <i>NPV</i>                 | <b>99.2%</b>                 | 98.6-99.5 | <b>99.4%</b>                          | 98.9-99.7 | <b>99.1%</b>                                  | 98.5-99.5 |
| <b>10 % Seroprevalence</b> |                              |           |                                       |           |                                               |           |
| <i>PPV</i>                 | <b>92.3%</b>                 | 86.2-95.9 | <b>97.4%</b>                          | 92.5-99.2 | <b>84.2%</b>                                  | 77.3-89.3 |
| <i>NPV</i>                 | <b>98.3%</b>                 | 97.0-99.0 | <b>98.8%</b>                          | 97.6-99.4 | <b>98.1%</b>                                  | 96.8-98.9 |

486

487

488 **Table 3.** Inter-rater agreement (Cohen's kappa) with linear weights. Value of K <0.20  
489 poor agreement, 0.21-0.40 fair agreement, 0.41-0.60 moderate agreement, 0.61-0.80  
490 good agreement, and 0.81-1.00 very good agreement.

491

|       | Abbott       |           |              | Kappa (95% CI)          |
|-------|--------------|-----------|--------------|-------------------------|
| Roche | NEG          | POS       |              | <b>0.87 (0.81-0.94)</b> |
| NEG   | 1149         | 9         | 1158 (95.0%) | Standard Error          |
| POS   | 6            | 55        | 61 (5.0%)    | 0.032                   |
|       | 1155 (94.7%) | 64 (5.3%) | 1219         |                         |

492

|          | Abbott       |           |              | Kappa (95% CI)          |
|----------|--------------|-----------|--------------|-------------------------|
| DiaSorin | NEG          | POS       |              | <b>0.71 (0.62-0.79)</b> |
| NEG      | 1131         | 14        | 1145 (93.9%) | Standard Error          |
| POS      | 24           | 50        | 74 (6.1%)    | 0.045                   |
|          | 1155 (94.7%) | 64 (5.3%) | 1219         |                         |

493

|       | DiaSorin     |           |              | Kappa (95% CI)          |
|-------|--------------|-----------|--------------|-------------------------|
| Roche | NEG          | POS       |              | <b>0.76 (0.67-0.84)</b> |
| NEG   | 1136         | 22        | 1158 (95.0%) | Standard Error          |
| POS   | 9            | 52        | 61 (5.0%)    | 0.042                   |
|       | 1145 (93.9%) | 74 (6.1%) |              |                         |

494

495

496 **Figure Captions**

497  
498 **Figure 1:** Specificity was determined using 1,154 serum samples taken before the  
499 circulation of SARS-CoV-2. For SARS-CoV-2 antibody tests Abbott SARS-CoV-2 IgG  
500 **(A)**, Roche Elecsys® Anti-SARS-CoV-2 **(B)**, and DiaSorin LIAISON® SARS-CoV-2  
501 S1/S2 IgG **(C)**, values of specificity samples are shown in rank order. Horizontal dotted  
502 lines mark the respective cut-offs recommended by the manufacturer and, in the case of  
503 DiaSorin, a gray zone for equivocal results. Vertical dotted lines indicate the median (\*)  
504 and the 90th percentile values (\*\*). Median and 90th percentile values of negative  
505 samples were 0.025 and 0.115 for Abbott, 0.0815 and 0.0927 for Roche, below LOD  
506 and 5.52 for DiaSorin.

507  
508 **Figure 2:** Quality criteria of the SARS-CoV-2 antibody tests Abbott SARS-CoV-2 IgG,  
509 Roche Elecsys® Anti-SARS-CoV-2, and DiaSorin LIAISON® SARS-CoV-2 S1/S2 IgG.  
510 Columns represent values of sensitivity, specificity **(A)**, PPV, and NPV **(B)** at 1%, 5%,  
511 and 10% assumed seroprevalence; bars indicate the 95% CI.

512  
513 **Figure 3:** Receiver Operating Characteristic (ROC) curves for Abbott **(A)**, Roche **(B)**,  
514 and DiaSorin **(C)** are shown. The Area Under the Curve (AUC) indicates the test  
515 accuracy, 95% confidence intervals are represented by gray dotted lines.

516

517

**A** Specificity = 99.2%

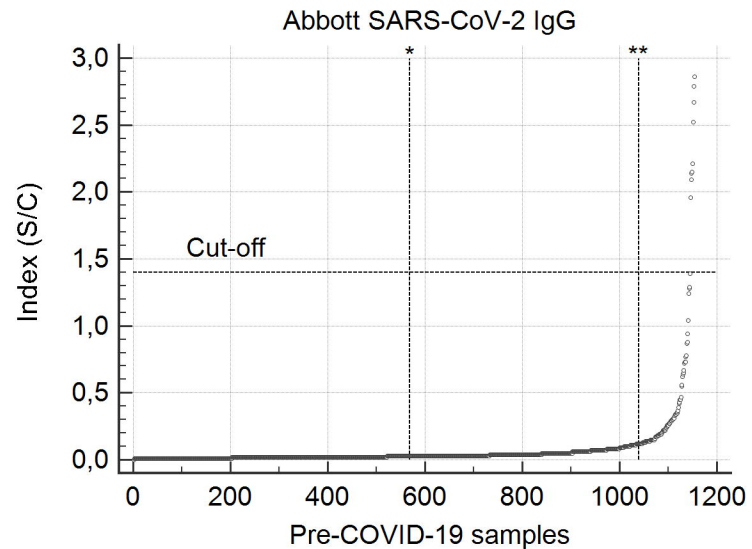

**B** Specificity = 99.7%

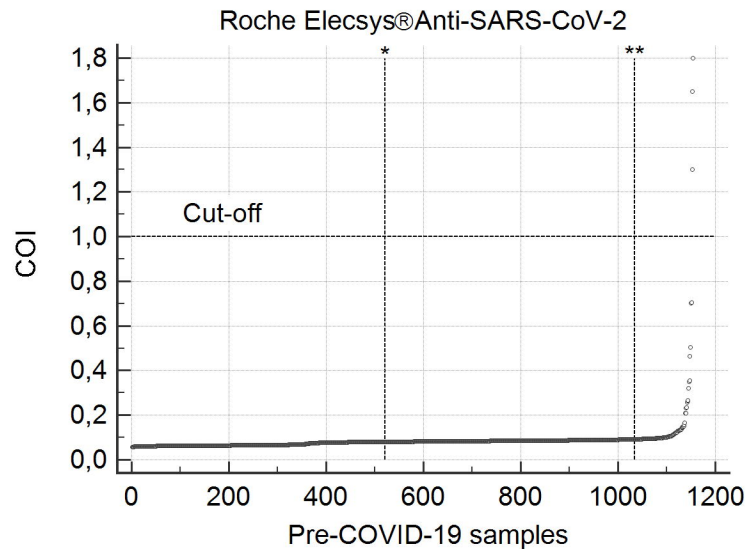

**C** Specificity = 98.3%

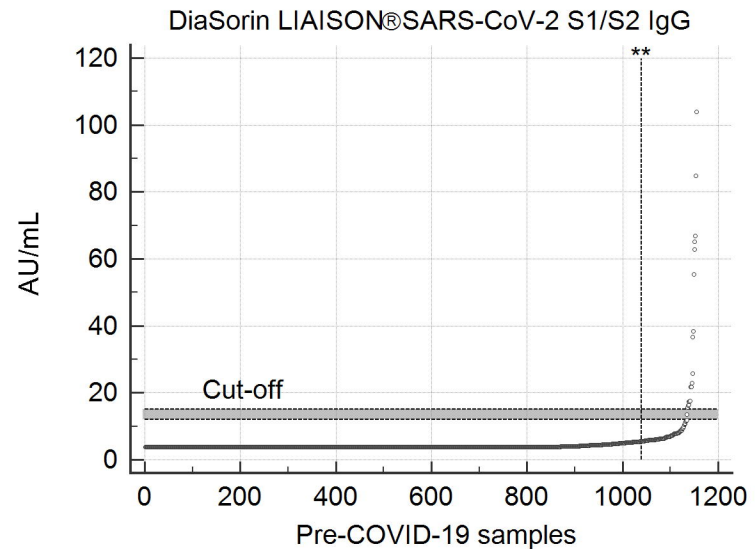

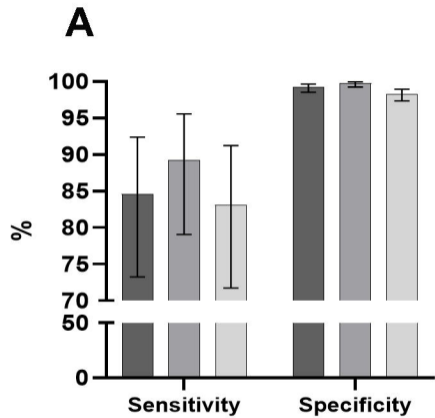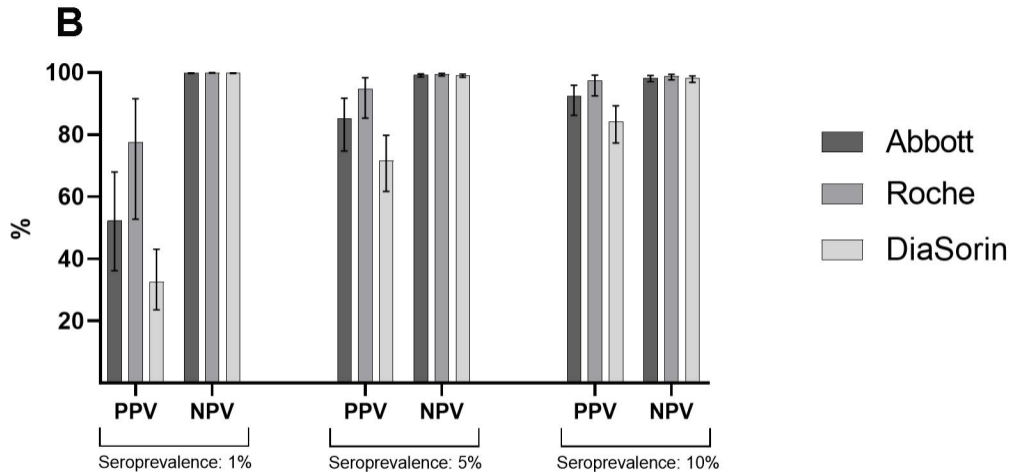

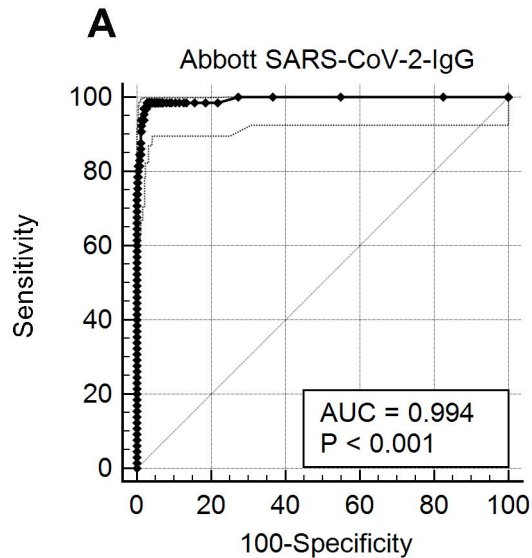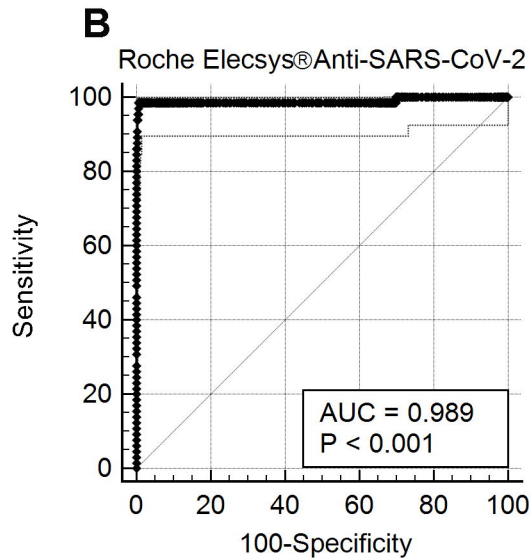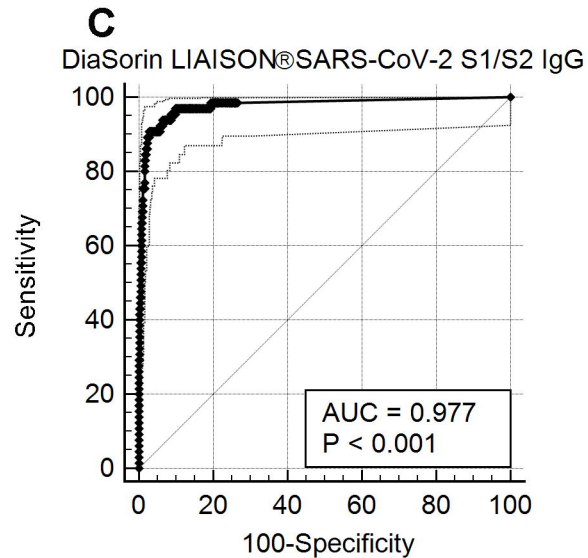

Source: https://www.medrxiv.org/content/10.1101/2020.06.04.20117911.full.pdf
